# Supplementary material for: A Trans-Amazonian Screening of mtDNA Reveals Deep Intraspecific Divergence in Forest Birds and Suggests a Vast Underestimation of Species Diversity
Source: PubMed Central journal article supplement (PMC3398903; doi:10.1371/journal.pone.0040541), 2012-07-17
Supplement: pone.0040541.s001.pdf [file pone.0040541.s001.pdf]

**Table S1.** Specimens sampled per species per locality. Species listed in alphabetical order.

| ID      | Species                          | Locality                                                      | Lat/Long              |
|---------|----------------------------------|---------------------------------------------------------------|-----------------------|
| 04N6347 | <i>Automolus ochrolaemus</i>     | Bilsa Biological Station, Bilsa, Esmeraldas, West Ecuador     | N 0.36076, W 79.71486 |
| 04N6352 | <i>Automolus ochrolaemus</i>     | Bilsa Biological Station, Bilsa, Esmeraldas, West Ecuador     | N 0.36076, W 79.71486 |
| 05N9842 | <i>Automolus ochrolaemus</i>     | Bilsa Biological Station, Bilsa, Esmeraldas, West Ecuador     | N 0.36076, W 79.71486 |
| 00N0972 | <i>Automolus ochrolaemus</i>     | Panacocha River, Panacocha, Sucumbios, East Ecuador           | S 0.38238, W 76.17612 |
| 08-0703 | <i>Automolus ochrolaemus</i>     | Parare Station, Nouragues, French Guiana                      | N 4.04055, W 52.6757  |
| 08-0724 | <i>Automolus ochrolaemus</i>     | Parare Station, Nouragues, French Guiana                      | N 4.04055, W 52.6757  |
| 08-0738 | <i>Automolus ochrolaemus</i>     | Parare Station, Nouragues, French Guiana                      | N 4.04055, W 52.6757  |
| 00N0632 | <i>Campylopterus largipennis</i> | Chontacocha, Loreto, Orellana, East Ecuador                   | S 0.67600, W 77.25429 |
| 00N0638 | <i>Campylopterus largipennis</i> | Chontacocha, Loreto, Orellana, East Ecuador                   | S 0.67600, W 77.25429 |
| 00N3305 | <i>Campylopterus largipennis</i> | Chontacocha, Loreto, Orellana, East Ecuador                   | S 0.67600, W 77.25429 |
| 07-0023 | <i>Campylopterus largipennis</i> | Inselberg Station, Nouragues, French Guiana                   | N 4.09412, W 52.68438 |
| 07-0091 | <i>Campylopterus largipennis</i> | Inselberg Station, Nouragues, French Guiana                   | N 4.09412, W 52.68438 |
| 07-0313 | <i>Campylopterus largipennis</i> | Inselberg Station, Nouragues, French Guiana                   | N 4.09412, W 52.68438 |
| 07-0314 | <i>Campylopterus largipennis</i> | Inselberg Station, Nouragues, French Guiana                   | N 4.09412, W 52.68438 |
| 07-0355 | <i>Campylopterus largipennis</i> | Inselberg Station, Nouragues, French Guiana                   | N 4.09412, W 52.68438 |
| 00N3336 | <i>Campylopterus largipennis</i> | Miazal Mission, Miazal, Morona-Santiago, East Ecuador         | S 2.63573, W 77.79831 |
| 07-0141 | <i>Chloroceryle aenea</i>        | Inselberg Station, Nouragues, French Guiana                   | N 4.09412, W 52.68438 |
| 00N0667 | <i>Chloroceryle aenea</i>        | Tiputini Biological Station, Tiputini, Orellana, East Ecuador | S 0.63698, W 76.14912 |
| 00N1045 | <i>Chloroceryle aenea</i>        | Tiputini Biological Station, Tiputini, Orellana, East Ecuador | S 0.63698, W 76.14912 |
| 00N0602 | <i>Conopophaga aurita</i>        | Chontacocha, Loreto, Orellana, East Ecuador                   | S 0.67600, W 77.25429 |
| 00N3254 | <i>Conopophaga aurita</i>        | Chontacocha, Loreto, Orellana, East Ecuador                   | S 0.67600, W 77.25429 |
| 00N3255 | <i>Conopophaga aurita</i>        | Chontacocha, Loreto, Orellana, East Ecuador                   | S 0.67600, W 77.25429 |
| 00N3290 | <i>Conopophaga aurita</i>        | Chontacocha, Loreto, Orellana, East Ecuador                   | S 0.67600, W 77.25429 |
| 00N3291 | <i>Conopophaga aurita</i>        | Chontacocha, Loreto, Orellana, East Ecuador                   | S 0.67600, W 77.25429 |
| 07-0129 | <i>Conopophaga aurita</i>        | Inselberg Station, Nouragues, French Guiana                   | N 4.09412, W 52.68438 |
| 00N0916 | <i>Conopophaga aurita</i>        | Panacocha River, Panacocha, Sucumbios, East Ecuador           | S 0.38238, W 76.17612 |
| 08-0730 | <i>Conopophaga aurita</i>        | Parare Station, Nouragues, French Guiana                      | N 4.04055, W 52.6757  |
| 07-0101 | <i>Corythopsis torquatus</i>     | Inselberg Station, Nouragues, French Guiana                   | N 4.09412, W 52.68438 |
| 07-0103 | <i>Corythopsis torquatus</i>     | Inselberg Station, Nouragues, French Guiana                   | N 4.09412, W 52.68438 |
| 07-0128 | <i>Corythopsis torquatus</i>     | Inselberg Station, Nouragues, French Guiana                   | N 4.09412, W 52.68438 |
| 07-0130 | <i>Corythopsis torquatus</i>     | Inselberg Station, Nouragues, French Guiana                   | N 4.09412, W 52.68438 |
| 99N5247 | <i>Corythopsis torquatus</i>     | Jatun Sacha Station, Misahualli, Napo, East Ecuador           | S 1.0215, W 77.62144  |
| 08-0867 | <i>Corythopsis torquatus</i>     | Paracou Field Station, Paracou, French Guiana                 | N 5.27595, W 52.9280  |
| 08-0716 | <i>Corythopsis torquatus</i>     | Parare Station, Nouragues, French Guiana                      | N 4.04055, W 52.6757  |
| 08-0729 | <i>Corythopsis torquatus</i>     | Parare Station, Nouragues, French Guiana                      | N 4.04055, W 52.6757  |
| 04N5783 | <i>Cyanocompsa cyanoides</i>     | Bilsa Biological Station, Bilsa, Esmeraldas, West Ecuador     | N 0.36076, W 79.71486 |
| 04N8410 | <i>Cyanocompsa cyanoides</i>     | Bilsa Biological Station, Bilsa, Esmeraldas, West Ecuador     | N 0.36076, W 79.71486 |
| 05N9237 | <i>Cyanocompsa cyanoides</i>     | Bilsa Biological Station, Bilsa, Esmeraldas, West Ecuador     | N 0.36076, W 79.71486 |
| 00N0798 | <i>Cyanocompsa cyanoides</i>     | Estacion Cientifica Yasuni, Yasuni, Orellana, East Ecuador    | S 0.67455, W 76.39837 |
| 07-0037 | <i>Cyanocompsa cyanoides</i>     | Inselberg Station, Nouragues, French Guiana                   | N 4.09412, W 52.68438 |
| 07-0154 | <i>Cyanocompsa cyanoides</i>     | Inselberg Station, Nouragues, French Guiana                   | N 4.09412, W 52.68438 |
| 07-0206 | <i>Cyanocompsa cyanoides</i>     | Inselberg Station, Nouragues, French Guiana                   | N 4.09412, W 52.68438 |
| 99N5259 | <i>Cyanocompsa cyanoides</i>     | Jatun Sacha Station, Misahualli, Napo, East Ecuador           | S 1.0215, W 77.62144  |
| 99N5260 | <i>Cyanocompsa cyanoides</i>     | Jatun Sacha Station, Misahualli, Napo, East Ecuador           | S 1.0215, W 77.62144  |
| 00N3332 | <i>Cyanocompsa cyanoides</i>     | Miazal Mission, Miazal, Morona-Santiago, East Ecuador         | S 2.63573, W 77.79831 |
| 00N3373 | <i>Cyanocompsa cyanoides</i>     | Miazal Mission, Miazal, Morona-Santiago, East Ecuador         | S 2.63573, W 77.79831 |
| 00N3420 | <i>Cyanocompsa cyanoides</i>     | Miazal Mission, Miazal, Morona-Santiago, East Ecuador         | S 2.63573, W 77.79831 |
| 00N0689 | <i>Cyanocompsa cyanoides</i>     | Tiputini Biological Station, Tiputini, Orellana, East Ecuador | S 0.63698, W 76.14912 |
| 00N5048 | <i>Cyanocompsa cyanoides</i>     | Tiputini Biological Station, Tiputini, Orellana, East Ecuador | S 0.63698, W 76.14912 |
| 05N0010 | <i>Cyanocompsa cyanoides</i>     | Tiputini Biological Station, Tiputini, Orellana, East Ecuador | S 0.63698, W 76.14912 |
| 00N3310 | <i>Cyphorhinus arada</i>         | Chontacocha, Loreto, Orellana, East Ecuador                   | S 0.67600, W 77.25429 |
| 00N0517 | <i>Cyphorhinus arada</i>         | Hollin River, Hollin, Napo, East Ecuador                      | S 0.68896, W 77.72658 |
| 07-0102 | <i>Cyphorhinus arada</i>         | Inselberg Station, Nouragues, French Guiana                   | N 4.09412, W 52.68438 |
| 07-0104 | <i>Cyphorhinus arada</i>         | Inselberg Station, Nouragues, French Guiana                   | N 4.09412, W 52.68438 |
| 07-0109 | <i>Cyphorhinus arada</i>         | Inselberg Station, Nouragues, French Guiana                   | N 4.09412, W 52.68438 |
| 07-0110 | <i>Cyphorhinus arada</i>         | Inselberg Station, Nouragues, French Guiana                   | N 4.09412, W 52.68438 |
| 08-0761 | <i>Cyphorhinus arada</i>         | Parare Station, Nouragues, French Guiana                      | N 4.04055, W 52.6757  |
| 04N5692 | <i>Dendrocincla fuliginosa</i>   | Bilsa Biological Station, Bilsa, Esmeraldas, West Ecuador     | N 0.36076, W 79.71486 |
| 04N5698 | <i>Dendrocincla fuliginosa</i>   | Bilsa Biological Station, Bilsa, Esmeraldas, West Ecuador     | N 0.36076, W 79.71486 |
| 04N5727 | <i>Dendrocincla fuliginosa</i>   | Bilsa Biological Station, Bilsa, Esmeraldas, West Ecuador     | N 0.36076, W 79.71486 |
| 04N5728 | <i>Dendrocincla fuliginosa</i>   | Bilsa Biological Station, Bilsa, Esmeraldas, West Ecuador     | N 0.36076, W 79.71486 |
| 04N5837 | <i>Dendrocincla fuliginosa</i>   | Bilsa Biological Station, Bilsa, Esmeraldas, West Ecuador     | N 0.36076, W 79.71486 |
| 04N5873 | <i>Dendrocincla fuliginosa</i>   | Bilsa Biological Station, Bilsa, Esmeraldas, West Ecuador     | N 0.36076, W 79.71486 |
| 04N5907 | <i>Dendrocincla fuliginosa</i>   | Bilsa Biological Station, Bilsa, Esmeraldas, West Ecuador     | N 0.36076, W 79.71486 |
| 04N5913 | <i>Dendrocincla fuliginosa</i>   | Bilsa Biological Station, Bilsa, Esmeraldas, West Ecuador     | N 0.36076, W 79.71486 |
| 04N5915 | <i>Dendrocincla fuliginosa</i>   | Bilsa Biological Station, Bilsa, Esmeraldas, West Ecuador     | N 0.36076, W 79.71486 |
| 04N5962 | <i>Dendrocincla fuliginosa</i>   | Bilsa Biological Station, Bilsa, Esmeraldas, West Ecuador     | N 0.36076, W 79.71486 |
| 04N5988 | <i>Dendrocincla fuliginosa</i>   | Bilsa Biological Station, Bilsa, Esmeraldas, West Ecuador     | N 0.36076, W 79.71486 |
| 04N6024 | <i>Dendrocincla fuliginosa</i>   | Bilsa Biological Station, Bilsa, Esmeraldas, West Ecuador     | N 0.36076, W 79.71486 |
| 06N1706 | <i>Dendrocincla fuliginosa</i>   | Bilsa Biological Station, Bilsa, Esmeraldas, West Ecuador     | N 0.36076, W 79.71486 |
| 00N0621 | <i>Dendrocincla fuliginosa</i>   | Chontacocha, Loreto, Orellana, East Ecuador                   | S 0.67600, W 77.25429 |
| 00N3275 | <i>Dendrocincla fuliginosa</i>   | Chontacocha, Loreto, Orellana, East Ecuador                   | S 0.67600, W 77.25429 |
| 00N3230 | <i>Dendrocincla fuliginosa</i>   | Hollin River, Hollin, Napo, East Ecuador                      | S 0.68896, W 77.72658 |
| 07-0215 | <i>Dendrocincla fuliginosa</i>   | Inselberg Station, Nouragues, French Guiana                   | N 4.09412, W 52.68438 |
| 07-0227 | <i>Dendrocincla fuliginosa</i>   | Inselberg Station, Nouragues, French Guiana                   | N 4.09412, W 52.68438 |
| 00N0995 | <i>Dendrocincla fuliginosa</i>   | Panacocha River, Panacocha, Sucumbios, East Ecuador           | S 0.38238, W 76.17612 |
| 00N1007 | <i>Dendrocincla fuliginosa</i>   | Panacocha River, Panacocha, Sucumbios, East Ecuador           | S 0.38238, W 76.17612 |
| 00N1034 | <i>Dendrocincla fuliginosa</i>   | Panacocha River, Panacocha, Sucumbios, East Ecuador           | S 0.38238, W 76.17612 |
| 08-0823 | <i>Dendrocincla fuliginosa</i>   | Paracou Field Station, Paracou, French Guiana                 | N 5.27595, W 52.9280  |
| 08-0824 | <i>Dendrocincla fuliginosa</i>   | Paracou Field Station, Paracou, French Guiana                 | N 5.27595, W 52.9280  |
| 00N5067 | <i>Dendrocincla fuliginosa</i>   | Tiputini Biological Station, Tiputini, Orellana, East Ecuador | S 0.63698, W 76.14912 |
| 00N0885 | <i>Dixiphia pipra</i>            | Estacion Cientifica Yasuni, Yasuni, Orellana, East Ecuador    | S 0.67455, W 76.39837 |
| 00N0570 | <i>Dixiphia pipra</i>            | Guagua Sumaco, Guagua Sumaco, Napo, East Ecuador              | S 0.72493, W 77.57564 |
| 00N0577 | <i>Dixiphia pipra</i>            | Guagua Sumaco, Guagua Sumaco, Napo, East Ecuador              | S 0.72493, W 77.57564 |
| 00N0591 | <i>Dixiphia pipra</i>            | Guagua Sumaco, Guagua Sumaco, Napo, East Ecuador              | S 0.72493, W 77.57564 |
| 00N3175 | <i>Dixiphia pipra</i>            | Hollin River, Hollin, Napo, East Ecuador                      | S 0.68896, W 77.72658 |
| 00N3218 | <i>Dixiphia pipra</i>            | Hollin River, Hollin, Napo, East Ecuador                      | S 0.68896, W 77.72658 |
| 00N3226 | <i>Dixiphia pipra</i>            | Hollin River, Hollin, Napo, East Ecuador                      | S 0.68896, W 77.72658 |

|         |                                |                                                                    |                       |
|---------|--------------------------------|--------------------------------------------------------------------|-----------------------|
| 00N3232 | <i>Dixiphia pipra</i>          | Hollin River, Hollin, Napo, East Ecuador                           | S 0.68896, W 77.72658 |
| 00N3235 | <i>Dixiphia pipra</i>          | Hollin River, Hollin, Napo, East Ecuador                           | S 0.68896, W 77.72658 |
| 07-0016 | <i>Dixiphia pipra</i>          | Inselberg Station, Nouragues, French Guiana                        | N 4.09412, W 52.68438 |
| 07-0026 | <i>Dixiphia pipra</i>          | Inselberg Station, Nouragues, French Guiana                        | N 4.09412, W 52.68438 |
| 07-0044 | <i>Dixiphia pipra</i>          | Inselberg Station, Nouragues, French Guiana                        | N 4.09412, W 52.68438 |
| 07-0049 | <i>Dixiphia pipra</i>          | Inselberg Station, Nouragues, French Guiana                        | N 4.09412, W 52.68438 |
| 07-0054 | <i>Dixiphia pipra</i>          | Inselberg Station, Nouragues, French Guiana                        | N 4.09412, W 52.68438 |
| 07-0162 | <i>Dixiphia pipra</i>          | Inselberg Station, Nouragues, French Guiana                        | N 4.09412, W 52.68438 |
| 07-0163 | <i>Dixiphia pipra</i>          | Inselberg Station, Nouragues, French Guiana                        | N 4.09412, W 52.68438 |
| 07-0172 | <i>Dixiphia pipra</i>          | Inselberg Station, Nouragues, French Guiana                        | N 4.09412, W 52.68438 |
| 07-0212 | <i>Dixiphia pipra</i>          | Inselberg Station, Nouragues, French Guiana                        | N 4.09412, W 52.68438 |
| 07-0299 | <i>Dixiphia pipra</i>          | Inselberg Station, Nouragues, French Guiana                        | N 4.09412, W 52.68438 |
| 07-0302 | <i>Dixiphia pipra</i>          | Inselberg Station, Nouragues, French Guiana                        | N 4.09412, W 52.68438 |
| 07-0303 | <i>Dixiphia pipra</i>          | Inselberg Station, Nouragues, French Guiana                        | N 4.09412, W 52.68438 |
| 07-0323 | <i>Dixiphia pipra</i>          | Inselberg Station, Nouragues, French Guiana                        | N 4.09412, W 52.68438 |
| 00N3474 | <i>Dixiphia pipra</i>          | Nueva Alianza, Sangay National Park, Morona-Santiago, East Ecuador | S 2.09883, W 78.15164 |
| 00N3475 | <i>Dixiphia pipra</i>          | Nueva Alianza, Sangay National Park, Morona-Santiago, East Ecuador | S 2.09883, W 78.15164 |
| 00N3478 | <i>Dixiphia pipra</i>          | Nueva Alianza, Sangay National Park, Morona-Santiago, East Ecuador | S 2.09883, W 78.15164 |
| 00N3498 | <i>Dixiphia pipra</i>          | Nueva Alianza, Sangay National Park, Morona-Santiago, East Ecuador | S 2.09883, W 78.15164 |
| 00N3502 | <i>Dixiphia pipra</i>          | Nueva Alianza, Sangay National Park, Morona-Santiago, East Ecuador | S 2.09883, W 78.15164 |
| 00N3521 | <i>Dixiphia pipra</i>          | Nueva Alianza, Sangay National Park, Morona-Santiago, East Ecuador | S 2.09883, W 78.15164 |
| 00N3539 | <i>Dixiphia pipra</i>          | Nueva Alianza, Sangay National Park, Morona-Santiago, East Ecuador | S 2.09883, W 78.15164 |
| 08-0834 | <i>Dixiphia pipra</i>          | Paracou Field Station, Paracou, French Guiana                      | N 5.27595, W 52.9280  |
| 08-0835 | <i>Dixiphia pipra</i>          | Paracou Field Station, Paracou, French Guiana                      | N 5.27595, W 52.9280  |
| 08-0836 | <i>Dixiphia pipra</i>          | Paracou Field Station, Paracou, French Guiana                      | N 5.27595, W 52.9280  |
| 08-0843 | <i>Dixiphia pipra</i>          | Paracou Field Station, Paracou, French Guiana                      | N 5.27595, W 52.9280  |
| 08-0853 | <i>Dixiphia pipra</i>          | Paracou Field Station, Paracou, French Guiana                      | N 5.27595, W 52.9280  |
| 08-0864 | <i>Dixiphia pipra</i>          | Paracou Field Station, Paracou, French Guiana                      | N 5.27595, W 52.9280  |
| 08-0884 | <i>Dixiphia pipra</i>          | Paracou Field Station, Paracou, French Guiana                      | N 5.27595, W 52.9280  |
| 08-0898 | <i>Dixiphia pipra</i>          | Paracou Field Station, Paracou, French Guiana                      | N 5.27595, W 52.9280  |
| 08-0899 | <i>Dixiphia pipra</i>          | Paracou Field Station, Paracou, French Guiana                      | N 5.27595, W 52.9280  |
| 08-0603 | <i>Dixiphia pipra</i>          | Parare Station, Nouragues, French Guiana                           | N 4.04055, W 52.6757  |
| 08-0622 | <i>Dixiphia pipra</i>          | Parare Station, Nouragues, French Guiana                           | N 4.04055, W 52.6757  |
| 08-0647 | <i>Dixiphia pipra</i>          | Parare Station, Nouragues, French Guiana                           | N 4.04055, W 52.6757  |
| 08-0736 | <i>Dixiphia pipra</i>          | Parare Station, Nouragues, French Guiana                           | N 4.04055, W 52.6757  |
| 00N0785 | <i>Dixiphia pipra</i>          | Tiputini Biological Station, Tiputini, Orellana, East Ecuador      | S 0.63698, W 76.14912 |
| 00N5025 | <i>Dixiphia pipra</i>          | Tiputini Biological Station, Tiputini, Orellana, East Ecuador      | S 0.63698, W 76.14912 |
| 05N0058 | <i>Dixiphia pipra</i>          | Tiputini Biological Station, Tiputini, Orellana, East Ecuador      | S 0.63698, W 76.14912 |
| 00N0605 | <i>Formicarius analis</i>      | Chontacocha, Loreto, Orellana, East Ecuador                        | S 0.67600, W 77.25429 |
| 00N3261 | <i>Formicarius analis</i>      | Chontacocha, Loreto, Orellana, East Ecuador                        | S 0.67600, W 77.25429 |
| 00N3292 | <i>Formicarius analis</i>      | Chontacocha, Loreto, Orellana, East Ecuador                        | S 0.67600, W 77.25429 |
| 07-0132 | <i>Formicarius analis</i>      | Inselberg Station, Nouragues, French Guiana                        | N 4.09412, W 52.68438 |
| 00N3444 | <i>Formicarius analis</i>      | Miazal Mission, Miazal, Morona-Santiago, East Ecuador              | S 2.63573, W 77.79831 |
| 05N0012 | <i>Formicarius analis</i>      | Tiputini Biological Station, Tiputini, Orellana, East Ecuador      | S 0.63698, W 76.14912 |
| 00N0809 | <i>Formicarius colma</i>       | Estacion Cientifica Yasuni, Yasuni, Orellana, East Ecuador         | S 0.67455, W 76.39837 |
| 00N0849 | <i>Formicarius colma</i>       | Estacion Cientifica Yasuni, Yasuni, Orellana, East Ecuador         | S 0.67455, W 76.39837 |
| 07-0105 | <i>Formicarius colma</i>       | Inselberg Station, Nouragues, French Guiana                        | N 4.09412, W 52.68438 |
| 07-0111 | <i>Formicarius colma</i>       | Inselberg Station, Nouragues, French Guiana                        | N 4.09412, W 52.68438 |
| 07-0237 | <i>Formicarius colma</i>       | Inselberg Station, Nouragues, French Guiana                        | N 4.09412, W 52.68438 |
| 07-0240 | <i>Formicarius colma</i>       | Inselberg Station, Nouragues, French Guiana                        | N 4.09412, W 52.68438 |
| 07-0359 | <i>Formicarius colma</i>       | Inselberg Station, Nouragues, French Guiana                        | N 4.09412, W 52.68438 |
| 07-0360 | <i>Formicarius colma</i>       | Inselberg Station, Nouragues, French Guiana                        | N 4.09412, W 52.68438 |
| 00N0907 | <i>Formicarius colma</i>       | Panacocha River, Panacocha, Sucumbios, East Ecuador                | S 0.38238, W 76.17612 |
| 00N0938 | <i>Formicarius colma</i>       | Panacocha River, Panacocha, Sucumbios, East Ecuador                | S 0.38238, W 76.17612 |
| 00N0974 | <i>Formicarius colma</i>       | Panacocha River, Panacocha, Sucumbios, East Ecuador                | S 0.38238, W 76.17612 |
| 08-0666 | <i>Formicarius colma</i>       | Parare Station, Nouragues, French Guiana                           | N 4.04055, W 52.6757  |
| 08-0735 | <i>Formicarius colma</i>       | Parare Station, Nouragues, French Guiana                           | N 4.04055, W 52.6757  |
| 08-0801 | <i>Formicarius colma</i>       | Parare Station, Nouragues, French Guiana                           | N 4.04055, W 52.6757  |
| 00N0759 | <i>Formicarius colma</i>       | Tiputini Biological Station, Tiputini, Orellana, East Ecuador      | S 0.63698, W 76.14912 |
| 07-0019 | <i>Galbula albirostris</i>     | Inselberg Station, Nouragues, French Guiana                        | N 4.09412, W 52.68438 |
| 07-0021 | <i>Galbula albirostris</i>     | Inselberg Station, Nouragues, French Guiana                        | N 4.09412, W 52.68438 |
| 07-0027 | <i>Galbula albirostris</i>     | Inselberg Station, Nouragues, French Guiana                        | N 4.09412, W 52.68438 |
| 07-0092 | <i>Galbula albirostris</i>     | Inselberg Station, Nouragues, French Guiana                        | N 4.09412, W 52.68438 |
| 07-0094 | <i>Galbula albirostris</i>     | Inselberg Station, Nouragues, French Guiana                        | N 4.09412, W 52.68438 |
| 00N5010 | <i>Galbula albirostris</i>     | Tiputini Biological Station, Tiputini, Orellana, East Ecuador      | S 0.63698, W 76.14912 |
| 00N5037 | <i>Galbula albirostris</i>     | Tiputini Biological Station, Tiputini, Orellana, East Ecuador      | S 0.63698, W 76.14912 |
| 05N0042 | <i>Galbula albirostris</i>     | Tiputini Biological Station, Tiputini, Orellana, East Ecuador      | S 0.63698, W 76.14912 |
| 04N8318 | <i>Geotrygon montana</i>       | Bilsa Biological Station, Bilsa, Esmeraldas, West Ecuador          | N 0.36076, W 79.71486 |
| 00N0619 | <i>Geotrygon montana</i>       | Chontacocha, Loreto, Orellana, East Ecuador                        | S 0.67600, W 77.25429 |
| 07-0048 | <i>Geotrygon montana</i>       | Inselberg Station, Nouragues, French Guiana                        | N 4.09412, W 52.68438 |
| 07-0306 | <i>Geotrygon montana</i>       | Inselberg Station, Nouragues, French Guiana                        | N 4.09412, W 52.68438 |
| 99N5257 | <i>Geotrygon montana</i>       | Jatun Sacha Station, Misahualli, Napo, East Ecuador                | S 1.0215, W 77.62144  |
| 00N3493 | <i>Geotrygon montana</i>       | Nueva Alianza, Sangay National Park, Morona-Santiago, East Ecuador | S 2.09883, W 78.15164 |
| 00N3528 | <i>Geotrygon montana</i>       | Nueva Alianza, Sangay National Park, Morona-Santiago, East Ecuador | S 2.09883, W 78.15164 |
| 05N0029 | <i>Geotrygon montana</i>       | Tiputini Biological Station, Tiputini, Orellana, East Ecuador      | S 0.63698, W 76.14912 |
| 03N1726 | <i>Glyphorhynchus spirurus</i> | Bilsa Biological Station, Bilsa, Esmeraldas, West Ecuador          | N 0.36076, W 79.71486 |
| 03N1757 | <i>Glyphorhynchus spirurus</i> | Bilsa Biological Station, Bilsa, Esmeraldas, West Ecuador          | N 0.36076, W 79.71486 |
| 03N1780 | <i>Glyphorhynchus spirurus</i> | Bilsa Biological Station, Bilsa, Esmeraldas, West Ecuador          | N 0.36076, W 79.71486 |
| 03N1782 | <i>Glyphorhynchus spirurus</i> | Bilsa Biological Station, Bilsa, Esmeraldas, West Ecuador          | N 0.36076, W 79.71486 |
| 03N1783 | <i>Glyphorhynchus spirurus</i> | Bilsa Biological Station, Bilsa, Esmeraldas, West Ecuador          | N 0.36076, W 79.71486 |
| 03N1784 | <i>Glyphorhynchus spirurus</i> | Bilsa Biological Station, Bilsa, Esmeraldas, West Ecuador          | N 0.36076, W 79.71486 |
| 03N1785 | <i>Glyphorhynchus spirurus</i> | Bilsa Biological Station, Bilsa, Esmeraldas, West Ecuador          | N 0.36076, W 79.71486 |
| 03N1817 | <i>Glyphorhynchus spirurus</i> | Bilsa Biological Station, Bilsa, Esmeraldas, West Ecuador          | N 0.36076, W 79.71486 |
| 03N1825 | <i>Glyphorhynchus spirurus</i> | Bilsa Biological Station, Bilsa, Esmeraldas, West Ecuador          | N 0.36076, W 79.71486 |
| 03N1850 | <i>Glyphorhynchus spirurus</i> | Bilsa Biological Station, Bilsa, Esmeraldas, West Ecuador          | N 0.36076, W 79.71486 |
| 02N9159 | <i>Glyphorhynchus spirurus</i> | Cumanda, Cumanda, Pastaza, East Ecuador                            | S 1.47686, W 78.14325 |
| 02N9171 | <i>Glyphorhynchus spirurus</i> | Cumanda, Cumanda, Pastaza, East Ecuador                            | S 1.47686, W 78.14325 |
| 02N9176 | <i>Glyphorhynchus spirurus</i> | Cumanda, Cumanda, Pastaza, East Ecuador                            | S 1.47686, W 78.14325 |
| 02N9178 | <i>Glyphorhynchus spirurus</i> | Cumanda, Cumanda, Pastaza, East Ecuador                            | S 1.47686, W 78.14325 |
| 02N9184 | <i>Glyphorhynchus spirurus</i> | Cumanda, Cumanda, Pastaza, East Ecuador                            | S 1.47686, W 78.14325 |
| 07-0011 | <i>Glyphorhynchus spirurus</i> | Inselberg Station, Nouragues, French Guiana                        | N 4.09412, W 52.68438 |
| 07-0017 | <i>Glyphorhynchus spirurus</i> | Inselberg Station, Nouragues, French Guiana                        | N 4.09412, W 52.68438 |









|         |                                |                                                                    |                       |
|---------|--------------------------------|--------------------------------------------------------------------|-----------------------|
| 04N8482 | <i>Platyrinchus coronatus</i>  | Bilsa Biological Station, Bilsa, Esmeraldas, West Ecuador          | N 0.36076, W 79.71486 |
| 05N7327 | <i>Platyrinchus coronatus</i>  | Bilsa Biological Station, Bilsa, Esmeraldas, West Ecuador          | N 0.36076, W 79.71486 |
| 05N7456 | <i>Platyrinchus coronatus</i>  | Bilsa Biological Station, Bilsa, Esmeraldas, West Ecuador          | N 0.36076, W 79.71486 |
| 00N0637 | <i>Platyrinchus coronatus</i>  | Chontacocha, Loreto, Orellana, East Ecuador                        | S 0.67600, W 77.25429 |
| 07-0010 | <i>Platyrinchus coronatus</i>  | Inselberg Station, Nouragues, French Guiana                        | N 4.09412, W 52.68438 |
| 07-0100 | <i>Platyrinchus coronatus</i>  | Inselberg Station, Nouragues, French Guiana                        | N 4.09412, W 52.68438 |
| 07-0221 | <i>Platyrinchus coronatus</i>  | Inselberg Station, Nouragues, French Guiana                        | N 4.09412, W 52.68438 |
| 07-0222 | <i>Platyrinchus coronatus</i>  | Inselberg Station, Nouragues, French Guiana                        | N 4.09412, W 52.68438 |
| 07-0223 | <i>Platyrinchus coronatus</i>  | Inselberg Station, Nouragues, French Guiana                        | N 4.09412, W 52.68438 |
| 08-0659 | <i>Platyrinchus coronatus</i>  | Parare Station, Nouragues, French Guiana                           | N 4.04055, W 52.6757  |
| 08-0686 | <i>Platyrinchus coronatus</i>  | Parare Station, Nouragues, French Guiana                           | N 4.04055, W 52.6757  |
| 08-0737 | <i>Platyrinchus coronatus</i>  | Parare Station, Nouragues, French Guiana                           | N 4.04055, W 52.6757  |
| 08-0740 | <i>Platyrinchus coronatus</i>  | Parare Station, Nouragues, French Guiana                           | N 4.04055, W 52.6757  |
| 08-0793 | <i>Platyrinchus coronatus</i>  | Parare Station, Nouragues, French Guiana                           | N 4.04055, W 52.6757  |
| 00N0662 | <i>Platyrinchus coronatus</i>  | Tiputini Biological Station, Tiputini, Orellana, East Ecuador      | S 0.63698, W 76.14912 |
| 00N0663 | <i>Platyrinchus coronatus</i>  | Tiputini Biological Station, Tiputini, Orellana, East Ecuador      | S 0.63698, W 76.14912 |
| 00N0675 | <i>Platyrinchus coronatus</i>  | Tiputini Biological Station, Tiputini, Orellana, East Ecuador      | S 0.63698, W 76.14912 |
| 00N0733 | <i>Platyrinchus coronatus</i>  | Tiputini Biological Station, Tiputini, Orellana, East Ecuador      | S 0.63698, W 76.14912 |
| 00N0749 | <i>Platyrinchus coronatus</i>  | Tiputini Biological Station, Tiputini, Orellana, East Ecuador      | S 0.63698, W 76.14912 |
| 05N0041 | <i>Platyrinchus coronatus</i>  | Tiputini Biological Station, Tiputini, Orellana, East Ecuador      | S 0.63698, W 76.14912 |
| 00N0846 | <i>Rhynchocyclus olivaceus</i> | Estacion Cientifica Yasuni, Yasuni, Orellana, East Ecuador         | S 0.67455, W 76.39837 |
| 07-0327 | <i>Rhynchocyclus olivaceus</i> | Inselberg Station, Nouragues, French Guiana                        | N 4.09412, W 52.68438 |
| 00N3437 | <i>Rhynchocyclus olivaceus</i> | Miazal Mission, Miazal, Morona-Santiago, East Ecuador              | S 2.63573, W 77.79831 |
| 08-0857 | <i>Rhynchocyclus olivaceus</i> | Paracou Field Station, Paracou, French Guiana                      | N 5.27595, W 52.9280  |
| 08-0723 | <i>Rhynchocyclus olivaceus</i> | Parare Station, Nouragues, French Guiana                           | N 4.04055, W 52.6757  |
| 08-0766 | <i>Rhynchocyclus olivaceus</i> | Parare Station, Nouragues, French Guiana                           | N 4.04055, W 52.6757  |
| 04N6080 | <i>Schiffornis turdina</i>     | Bilsa Biological Station, Bilsa, Esmeraldas, West Ecuador          | N 0.36076, W 79.71486 |
| 04N6083 | <i>Schiffornis turdina</i>     | Bilsa Biological Station, Bilsa, Esmeraldas, West Ecuador          | N 0.36076, W 79.71486 |
| 04N6281 | <i>Schiffornis turdina</i>     | Bilsa Biological Station, Bilsa, Esmeraldas, West Ecuador          | N 0.36076, W 79.71486 |
| 04N6764 | <i>Schiffornis turdina</i>     | Bilsa Biological Station, Bilsa, Esmeraldas, West Ecuador          | N 0.36076, W 79.71486 |
| 04N7915 | <i>Schiffornis turdina</i>     | Bilsa Biological Station, Bilsa, Esmeraldas, West Ecuador          | N 0.36076, W 79.71486 |
| 00N0564 | <i>Schiffornis turdina</i>     | Guagua Sumaco, Guagua Sumaco, Napo, East Ecuador                   | S 0.72493, W 77.57564 |
| 00N3171 | <i>Schiffornis turdina</i>     | Hollin River, Hollin, Napo, East Ecuador                           | S 0.68896, W 77.72658 |
| 02N9114 | <i>Schiffornis turdina</i>     | Hollin River, Hollin, Napo, East Ecuador                           | S 0.68896, W 77.72658 |
| 07-0071 | <i>Schiffornis turdina</i>     | Inselberg Station, Nouragues, French Guiana                        | N 4.09412, W 52.68438 |
| 07-0147 | <i>Schiffornis turdina</i>     | Inselberg Station, Nouragues, French Guiana                        | N 4.09412, W 52.68438 |
| 07-0264 | <i>Schiffornis turdina</i>     | Inselberg Station, Nouragues, French Guiana                        | N 4.09412, W 52.68438 |
| 07-0311 | <i>Schiffornis turdina</i>     | Inselberg Station, Nouragues, French Guiana                        | N 4.09412, W 52.68438 |
| 00N3526 | <i>Schiffornis turdina</i>     | Nueva Alianza, Sangay National Park, Morona-Santiago, East Ecuador | S 2.09883, W 78.15164 |
| 00N5015 | <i>Schiffornis turdina</i>     | Tiputini Biological Station, Tiputini, Orellana, East Ecuador      | S 0.63698, W 76.14912 |
| 05N7441 | <i>Sclerurus mexicanus</i>     | Bilsa Biological Station, Bilsa, Esmeraldas, West Ecuador          | N 0.36076, W 79.71486 |
| 05N8997 | <i>Sclerurus mexicanus</i>     | Bilsa Biological Station, Bilsa, Esmeraldas, West Ecuador          | N 0.36076, W 79.71486 |
| 05N9053 | <i>Sclerurus mexicanus</i>     | Bilsa Biological Station, Bilsa, Esmeraldas, West Ecuador          | N 0.36076, W 79.71486 |
| 00N3231 | <i>Sclerurus mexicanus</i>     | Hollin River, Hollin, Napo, East Ecuador                           | S 0.68896, W 77.72658 |
| 07-0087 | <i>Sclerurus mexicanus</i>     | Inselberg Station, Nouragues, French Guiana                        | N 4.09412, W 52.68438 |
| 00N3535 | <i>Sclerurus mexicanus</i>     | Nueva Alianza, Sangay National Park, Morona-Santiago, East Ecuador | S 2.09883, W 78.15164 |
| 00N3542 | <i>Sclerurus mexicanus</i>     | Nueva Alianza, Sangay National Park, Morona-Santiago, East Ecuador | S 2.09883, W 78.15164 |
| 02N9350 | <i>Sclerurus mexicanus</i>     | Nueva Alianza, Sangay National Park, Morona-Santiago, East Ecuador | S 2.09883, W 78.15164 |
| 00N5049 | <i>Sclerurus mexicanus</i>     | Tiputini Biological Station, Tiputini, Orellana, East Ecuador      | S 0.63698, W 76.14912 |
| 00N5054 | <i>Sclerurus mexicanus</i>     | Tiputini Biological Station, Tiputini, Orellana, East Ecuador      | S 0.63698, W 76.14912 |
| 00N3278 | <i>Tachyphonus surinamus</i>   | Chontacocha, Loreto, Orellana, East Ecuador                        | S 0.67600, W 77.25429 |
| 00N3281 | <i>Tachyphonus surinamus</i>   | Chontacocha, Loreto, Orellana, East Ecuador                        | S 0.67600, W 77.25429 |
| 00N0888 | <i>Tachyphonus surinamus</i>   | Estacion Cientifica Yasuni, Yasuni, Orellana, East Ecuador         | S 0.67455, W 76.39837 |
| 07-0185 | <i>Tachyphonus surinamus</i>   | Inselberg Station, Nouragues, French Guiana                        | N 4.09412, W 52.68438 |
| 07-0196 | <i>Tachyphonus surinamus</i>   | Inselberg Station, Nouragues, French Guiana                        | N 4.09412, W 52.68438 |
| 07-0202 | <i>Tachyphonus surinamus</i>   | Inselberg Station, Nouragues, French Guiana                        | N 4.09412, W 52.68438 |
| 07-0213 | <i>Tachyphonus surinamus</i>   | Inselberg Station, Nouragues, French Guiana                        | N 4.09412, W 52.68438 |
| 07-0216 | <i>Tachyphonus surinamus</i>   | Inselberg Station, Nouragues, French Guiana                        | N 4.09412, W 52.68438 |
| 07-0217 | <i>Tachyphonus surinamus</i>   | Inselberg Station, Nouragues, French Guiana                        | N 4.09412, W 52.68438 |
| 07-0218 | <i>Tachyphonus surinamus</i>   | Inselberg Station, Nouragues, French Guiana                        | N 4.09412, W 52.68438 |
| 07-0219 | <i>Tachyphonus surinamus</i>   | Inselberg Station, Nouragues, French Guiana                        | N 4.09412, W 52.68438 |
| 00N3314 | <i>Tachyphonus surinamus</i>   | Miazal Mission, Miazal, Morona-Santiago, East Ecuador              | S 2.63573, W 77.79831 |
| 00N3438 | <i>Tachyphonus surinamus</i>   | Miazal Mission, Miazal, Morona-Santiago, East Ecuador              | S 2.63573, W 77.79831 |
| 08-0892 | <i>Tachyphonus surinamus</i>   | Paracou Field Station, Paracou, French Guiana                      | N 5.27595, W 52.9280  |
| 04N0471 | <i>Thalurania fannyi</i>       | Los Bancos, Los Bancos, Pichincha, West Ecuador                    | N 0.06479, W 78.98241 |
| 04N0472 | <i>Thalurania fannyi</i>       | Los Bancos, Los Bancos, Pichincha, West Ecuador                    | N 0.06479, W 78.98241 |
| 04N0335 | <i>Thalurania fannyi</i>       | Reserva Forestal La Magusa, Las Delicias, Pichincha, West Ecuador  | N 0.16386, W 78.86964 |
| 04N0384 | <i>Thalurania fannyi</i>       | Reserva Forestal La Magusa, Las Delicias, Pichincha, West Ecuador  | N 0.16386, W 78.86964 |
| 04N0391 | <i>Thalurania fannyi</i>       | Reserva Forestal La Magusa, Las Delicias, Pichincha, West Ecuador  | N 0.16386, W 78.86964 |
| 04N0580 | <i>Thalurania fannyi</i>       | Reserva Forestal La Magusa, Las Delicias, Pichincha, West Ecuador  | N 0.16386, W 78.86964 |
| 00N0654 | <i>Thalurania furcata</i>      | Chontacocha, Loreto, Orellana, East Ecuador                        | S 0.67600, W 77.25429 |
| 00N0501 | <i>Thalurania furcata</i>      | Hollin River, Hollin, Napo, East Ecuador                           | S 0.68896, W 77.72658 |
| 02N9092 | <i>Thalurania furcata</i>      | Hollin River, Hollin, Napo, East Ecuador                           | S 0.68896, W 77.72658 |
| 02N9143 | <i>Thalurania furcata</i>      | Hollin River, Hollin, Napo, East Ecuador                           | S 0.68896, W 77.72658 |
| 07-0052 | <i>Thalurania furcata</i>      | Inselberg Station, Nouragues, French Guiana                        | N 4.09412, W 52.68438 |
| 07-0065 | <i>Thalurania furcata</i>      | Inselberg Station, Nouragues, French Guiana                        | N 4.09412, W 52.68438 |
| 07-0067 | <i>Thalurania furcata</i>      | Inselberg Station, Nouragues, French Guiana                        | N 4.09412, W 52.68438 |
| 07-0081 | <i>Thalurania furcata</i>      | Inselberg Station, Nouragues, French Guiana                        | N 4.09412, W 52.68438 |
| 07-0082 | <i>Thalurania furcata</i>      | Inselberg Station, Nouragues, French Guiana                        | N 4.09412, W 52.68438 |
| 07-0149 | <i>Thalurania furcata</i>      | Inselberg Station, Nouragues, French Guiana                        | N 4.09412, W 52.68438 |
| 07-0150 | <i>Thalurania furcata</i>      | Inselberg Station, Nouragues, French Guiana                        | N 4.09412, W 52.68438 |
| 07-0168 | <i>Thalurania furcata</i>      | Inselberg Station, Nouragues, French Guiana                        | N 4.09412, W 52.68438 |
| 07-0170 | <i>Thalurania furcata</i>      | Inselberg Station, Nouragues, French Guiana                        | N 4.09412, W 52.68438 |
| 00N3362 | <i>Thalurania furcata</i>      | Miazal Mission, Miazal, Morona-Santiago, East Ecuador              | S 2.63573, W 77.79831 |
| 00N3366 | <i>Thalurania furcata</i>      | Miazal Mission, Miazal, Morona-Santiago, East Ecuador              | S 2.63573, W 77.79831 |
| 00N3424 | <i>Thalurania furcata</i>      | Miazal Mission, Miazal, Morona-Santiago, East Ecuador              | S 2.63573, W 77.79831 |
| 00N3429 | <i>Thalurania furcata</i>      | Miazal Mission, Miazal, Morona-Santiago, East Ecuador              | S 2.63573, W 77.79831 |
| 00N3491 | <i>Thalurania furcata</i>      | Nueva Alianza, Sangay National Park, Morona-Santiago, East Ecuador | S 2.09883, W 78.15164 |
| 00N3507 | <i>Thalurania furcata</i>      | Nueva Alianza, Sangay National Park, Morona-Santiago, East Ecuador | S 2.09883, W 78.15164 |
| 08-0706 | <i>Thalurania furcata</i>      | Parare Station, Nouragues, French Guiana                           | N 4.04055, W 52.6757  |
| 00N0722 | <i>Thalurania furcata</i>      | Tiputini Biological Station, Tiputini, Orellana, East Ecuador      | S 0.63698, W 76.14912 |
| 00N0734 | <i>Thalurania furcata</i>      | Tiputini Biological Station, Tiputini, Orellana, East Ecuador      | S 0.63698, W 76.14912 |

|         |                               |                                                                    |                       |
|---------|-------------------------------|--------------------------------------------------------------------|-----------------------|
| 00N5062 | <i>Thalurania furcata</i>     | Tiputini Biological Station, Tiputini, Orellana, East Ecuador      | S 0.63698, W 76.14912 |
| 00N3253 | <i>Thamnomanes ardesiacus</i> | Chontacocha, Loreto, Orellana, East Ecuador                        | S 0.67600, W 77.25429 |
| 00N3265 | <i>Thamnomanes ardesiacus</i> | Chontacocha, Loreto, Orellana, East Ecuador                        | S 0.67600, W 77.25429 |
| 00N0823 | <i>Thamnomanes ardesiacus</i> | Estacion Cientifica Yasuni, Yasuni, Orellana, East Ecuador         | S 0.67455, W 76.39837 |
| 00N0826 | <i>Thamnomanes ardesiacus</i> | Estacion Cientifica Yasuni, Yasuni, Orellana, East Ecuador         | S 0.67455, W 76.39837 |
| 07-0006 | <i>Thamnomanes ardesiacus</i> | Inselberg Station, Nouragues, French Guiana                        | N 4.09412, W 52.68438 |
| 07-0086 | <i>Thamnomanes ardesiacus</i> | Inselberg Station, Nouragues, French Guiana                        | N 4.09412, W 52.68438 |
| 07-0145 | <i>Thamnomanes ardesiacus</i> | Inselberg Station, Nouragues, French Guiana                        | N 4.09412, W 52.68438 |
| 07-0177 | <i>Thamnomanes ardesiacus</i> | Inselberg Station, Nouragues, French Guiana                        | N 4.09412, W 52.68438 |
| 07-0182 | <i>Thamnomanes ardesiacus</i> | Inselberg Station, Nouragues, French Guiana                        | N 4.09412, W 52.68438 |
| 07-0238 | <i>Thamnomanes ardesiacus</i> | Inselberg Station, Nouragues, French Guiana                        | N 4.09412, W 52.68438 |
| 07-0250 | <i>Thamnomanes ardesiacus</i> | Inselberg Station, Nouragues, French Guiana                        | N 4.09412, W 52.68438 |
| 07-0254 | <i>Thamnomanes ardesiacus</i> | Inselberg Station, Nouragues, French Guiana                        | N 4.09412, W 52.68438 |
| 07-0269 | <i>Thamnomanes ardesiacus</i> | Inselberg Station, Nouragues, French Guiana                        | N 4.09412, W 52.68438 |
| 07-0273 | <i>Thamnomanes ardesiacus</i> | Inselberg Station, Nouragues, French Guiana                        | N 4.09412, W 52.68438 |
| 07-0274 | <i>Thamnomanes ardesiacus</i> | Inselberg Station, Nouragues, French Guiana                        | N 4.09412, W 52.68438 |
| 07-0328 | <i>Thamnomanes ardesiacus</i> | Inselberg Station, Nouragues, French Guiana                        | N 4.09412, W 52.68438 |
| 07-0358 | <i>Thamnomanes ardesiacus</i> | Inselberg Station, Nouragues, French Guiana                        | N 4.09412, W 52.68438 |
| 00N0908 | <i>Thamnomanes ardesiacus</i> | Panacocha River, Panacocha, Sucumbios, East Ecuador                | S 0.38238, W 76.17612 |
| 00N0912 | <i>Thamnomanes ardesiacus</i> | Panacocha River, Panacocha, Sucumbios, East Ecuador                | S 0.38238, W 76.17612 |
| 00N0913 | <i>Thamnomanes ardesiacus</i> | Panacocha River, Panacocha, Sucumbios, East Ecuador                | S 0.38238, W 76.17612 |
| 00N0935 | <i>Thamnomanes ardesiacus</i> | Panacocha River, Panacocha, Sucumbios, East Ecuador                | S 0.38238, W 76.17612 |
| 00N0968 | <i>Thamnomanes ardesiacus</i> | Panacocha River, Panacocha, Sucumbios, East Ecuador                | S 0.38238, W 76.17612 |
| 00N0985 | <i>Thamnomanes ardesiacus</i> | Panacocha River, Panacocha, Sucumbios, East Ecuador                | S 0.38238, W 76.17612 |
| 00N1004 | <i>Thamnomanes ardesiacus</i> | Panacocha River, Panacocha, Sucumbios, East Ecuador                | S 0.38238, W 76.17612 |
| 00N1006 | <i>Thamnomanes ardesiacus</i> | Panacocha River, Panacocha, Sucumbios, East Ecuador                | S 0.38238, W 76.17612 |
| 00N1022 | <i>Thamnomanes ardesiacus</i> | Panacocha River, Panacocha, Sucumbios, East Ecuador                | S 0.38238, W 76.17612 |
| 08-0860 | <i>Thamnomanes ardesiacus</i> | Paracou Field Station, Paracou, French Guiana                      | N 5.27595, W 52.9280  |
| 08-0862 | <i>Thamnomanes ardesiacus</i> | Paracou Field Station, Paracou, French Guiana                      | N 5.27595, W 52.9280  |
| 08-0872 | <i>Thamnomanes ardesiacus</i> | Paracou Field Station, Paracou, French Guiana                      | N 5.27595, W 52.9280  |
| 08-0694 | <i>Thamnomanes ardesiacus</i> | Parare Station, Nouragues, French Guiana                           | N 4.04055, W 52.6757  |
| 08-0713 | <i>Thamnomanes ardesiacus</i> | Parare Station, Nouragues, French Guiana                           | N 4.04055, W 52.6757  |
| 08-0720 | <i>Thamnomanes ardesiacus</i> | Parare Station, Nouragues, French Guiana                           | N 4.04055, W 52.6757  |
| 08-0725 | <i>Thamnomanes ardesiacus</i> | Parare Station, Nouragues, French Guiana                           | N 4.04055, W 52.6757  |
| 08-0769 | <i>Thamnomanes ardesiacus</i> | Parare Station, Nouragues, French Guiana                           | N 4.04055, W 52.6757  |
| 00N0661 | <i>Thamnomanes ardesiacus</i> | Tiputini Biological Station, Tiputini, Orellana, East Ecuador      | S 0.63698, W 76.14912 |
| 00N0673 | <i>Thamnomanes ardesiacus</i> | Tiputini Biological Station, Tiputini, Orellana, East Ecuador      | S 0.63698, W 76.14912 |
| 00N0725 | <i>Thamnomanes ardesiacus</i> | Tiputini Biological Station, Tiputini, Orellana, East Ecuador      | S 0.63698, W 76.14912 |
| 00N0772 | <i>Thamnomanes ardesiacus</i> | Tiputini Biological Station, Tiputini, Orellana, East Ecuador      | S 0.63698, W 76.14912 |
| 00N0780 | <i>Thamnomanes ardesiacus</i> | Tiputini Biological Station, Tiputini, Orellana, East Ecuador      | S 0.63698, W 76.14912 |
| 00N0782 | <i>Thamnomanes ardesiacus</i> | Tiputini Biological Station, Tiputini, Orellana, East Ecuador      | S 0.63698, W 76.14912 |
| 00N1050 | <i>Thamnomanes ardesiacus</i> | Tiputini Biological Station, Tiputini, Orellana, East Ecuador      | S 0.63698, W 76.14912 |
| 00N5011 | <i>Thamnomanes ardesiacus</i> | Tiputini Biological Station, Tiputini, Orellana, East Ecuador      | S 0.63698, W 76.14912 |
| 00N5039 | <i>Thamnomanes ardesiacus</i> | Tiputini Biological Station, Tiputini, Orellana, East Ecuador      | S 0.63698, W 76.14912 |
| 05N0009 | <i>Thamnomanes ardesiacus</i> | Tiputini Biological Station, Tiputini, Orellana, East Ecuador      | S 0.63698, W 76.14912 |
| 05N0023 | <i>Thamnomanes ardesiacus</i> | Tiputini Biological Station, Tiputini, Orellana, East Ecuador      | S 0.63698, W 76.14912 |
| 05N0026 | <i>Thamnomanes ardesiacus</i> | Tiputini Biological Station, Tiputini, Orellana, East Ecuador      | S 0.63698, W 76.14912 |
| 05N0063 | <i>Thamnomanes ardesiacus</i> | Tiputini Biological Station, Tiputini, Orellana, East Ecuador      | S 0.63698, W 76.14912 |
| 07-0112 | <i>Thamnomanes caesius</i>    | Inselberg Station, Nouragues, French Guiana                        | N 4.09412, W 52.68438 |
| 07-0326 | <i>Thamnomanes caesius</i>    | Inselberg Station, Nouragues, French Guiana                        | N 4.09412, W 52.68438 |
| 00N3376 | <i>Thamnomanes caesius</i>    | Miazal Mission, Miazal, Morona-Santiago, East Ecuador              | S 2.63573, W 77.79831 |
| 08-0905 | <i>Thamnomanes caesius</i>    | Paracou Field Station, Paracou, French Guiana                      | N 5.27595, W 52.9280  |
| 08-0714 | <i>Thamnomanes caesius</i>    | Parare Station, Nouragues, French Guiana                           | N 4.04055, W 52.6757  |
| 08-0717 | <i>Thamnomanes caesius</i>    | Parare Station, Nouragues, French Guiana                           | N 4.04055, W 52.6757  |
| 00N0659 | <i>Thamnomanes caesius</i>    | Tiputini Biological Station, Tiputini, Orellana, East Ecuador      | S 0.63698, W 76.14912 |
| 00N0706 | <i>Thamnomanes caesius</i>    | Tiputini Biological Station, Tiputini, Orellana, East Ecuador      | S 0.63698, W 76.14912 |
| 00N0707 | <i>Thamnomanes caesius</i>    | Tiputini Biological Station, Tiputini, Orellana, East Ecuador      | S 0.63698, W 76.14912 |
| 00N0743 | <i>Thamnomanes caesius</i>    | Tiputini Biological Station, Tiputini, Orellana, East Ecuador      | S 0.63698, W 76.14912 |
| 00N5000 | <i>Thamnomanes caesius</i>    | Tiputini Biological Station, Tiputini, Orellana, East Ecuador      | S 0.63698, W 76.14912 |
| 00N5040 | <i>Thamnomanes caesius</i>    | Tiputini Biological Station, Tiputini, Orellana, East Ecuador      | S 0.63698, W 76.14912 |
| 05N0112 | <i>Thamnomanes caesius</i>    | Tiputini Biological Station, Tiputini, Orellana, East Ecuador      | S 0.63698, W 76.14912 |
| 04N6509 | <i>Trogon rufus</i>           | Bilsa Biological Station, Bilsa, Esmeraldas, West Ecuador          | N 0.36076, W 79.71486 |
| 05N8688 | <i>Trogon rufus</i>           | Bilsa Biological Station, Bilsa, Esmeraldas, West Ecuador          | N 0.36076, W 79.71486 |
| 05N8962 | <i>Trogon rufus</i>           | Bilsa Biological Station, Bilsa, Esmeraldas, West Ecuador          | N 0.36076, W 79.71486 |
| 05N9841 | <i>Trogon rufus</i>           | Bilsa Biological Station, Bilsa, Esmeraldas, West Ecuador          | N 0.36076, W 79.71486 |
| 07-0295 | <i>Trogon rufus</i>           | Inselberg Station, Nouragues, French Guiana                        | N 4.09412, W 52.68438 |
| 00N0927 | <i>Trogon rufus</i>           | Panacocha River, Panacocha, Sucumbios, East Ecuador                | S 0.38238, W 76.17612 |
| 00N0738 | <i>Trogon rufus</i>           | Tiputini Biological Station, Tiputini, Orellana, East Ecuador      | S 0.63698, W 76.14912 |
| 02N9232 | <i>Turdus albicollis</i>      | Cumanda, Cumanda, Pastaza, East Ecuador                            | S 1.47686, W 78.14325 |
| 00N0836 | <i>Turdus albicollis</i>      | Estacion Cientifica Yasuni, Yasuni, Orellana, East Ecuador         | S 0.67455, W 76.39837 |
| 07-0007 | <i>Turdus albicollis</i>      | Inselberg Station, Nouragues, French Guiana                        | N 4.09412, W 52.68438 |
| 07-0074 | <i>Turdus albicollis</i>      | Inselberg Station, Nouragues, French Guiana                        | N 4.09412, W 52.68438 |
| 07-0075 | <i>Turdus albicollis</i>      | Inselberg Station, Nouragues, French Guiana                        | N 4.09412, W 52.68438 |
| 07-0116 | <i>Turdus albicollis</i>      | Inselberg Station, Nouragues, French Guiana                        | N 4.09412, W 52.68438 |
| 07-0184 | <i>Turdus albicollis</i>      | Inselberg Station, Nouragues, French Guiana                        | N 4.09412, W 52.68438 |
| 07-0186 | <i>Turdus albicollis</i>      | Inselberg Station, Nouragues, French Guiana                        | N 4.09412, W 52.68438 |
| 07-0200 | <i>Turdus albicollis</i>      | Inselberg Station, Nouragues, French Guiana                        | N 4.09412, W 52.68438 |
| 07-0290 | <i>Turdus albicollis</i>      | Inselberg Station, Nouragues, French Guiana                        | N 4.09412, W 52.68438 |
| 07-0307 | <i>Turdus albicollis</i>      | Inselberg Station, Nouragues, French Guiana                        | N 4.09412, W 52.68438 |
| 07-0308 | <i>Turdus albicollis</i>      | Inselberg Station, Nouragues, French Guiana                        | N 4.09412, W 52.68438 |
| 99N5273 | <i>Turdus albicollis</i>      | Jatun Sacha Station, Misahualli, Napo, East Ecuador                | S 1.0215, W 77.62144  |
| 00N3527 | <i>Turdus albicollis</i>      | Nueva Alianza, Sangay National Park, Morona-Santiago, East Ecuador | S 2.09883, W 78.15164 |
| 00N3530 | <i>Turdus albicollis</i>      | Nueva Alianza, Sangay National Park, Morona-Santiago, East Ecuador | S 2.09883, W 78.15164 |
| 08-0840 | <i>Turdus albicollis</i>      | Paracou Field Station, Paracou, French Guiana                      | N 5.27595, W 52.9280  |
| 08-0841 | <i>Turdus albicollis</i>      | Paracou Field Station, Paracou, French Guiana                      | N 5.27595, W 52.9280  |
| 08-0842 | <i>Turdus albicollis</i>      | Paracou Field Station, Paracou, French Guiana                      | N 5.27595, W 52.9280  |
| 08-0886 | <i>Turdus albicollis</i>      | Paracou Field Station, Paracou, French Guiana                      | N 5.27595, W 52.9280  |
| 08-0897 | <i>Turdus albicollis</i>      | Paracou Field Station, Paracou, French Guiana                      | N 5.27595, W 52.9280  |
| 08-0645 | <i>Turdus albicollis</i>      | Parare Station, Nouragues, French Guiana                           | N 4.04055, W 52.6757  |
| 08-0689 | <i>Turdus albicollis</i>      | Parare Station, Nouragues, French Guiana                           | N 4.04055, W 52.6757  |
| 08-0731 | <i>Turdus albicollis</i>      | Parare Station, Nouragues, French Guiana                           | N 4.04055, W 52.6757  |
| 00N0721 | <i>Turdus albicollis</i>      | Tiputini Biological Station, Tiputini, Orellana, East Ecuador      | S 0.63698, W 76.14912 |



|         |                          |                                                               |                       |
|---------|--------------------------|---------------------------------------------------------------|-----------------------|
| 00N0748 | <i>Turdus albicollis</i> | Tiputini Biological Station, Tiputini, Orellana, East Ecuador | S 0.63698, W 76.14912 |
| 00N5006 | <i>Turdus albicollis</i> | Tiputini Biological Station, Tiputini, Orellana, East Ecuador | S 0.63698, W 76.14912 |
| 00N5073 | <i>Turdus albicollis</i> | Tiputini Biological Station, Tiputini, Orellana, East Ecuador | S 0.63698, W 76.14912 |
| 04N6520 | <i>Xenops minutus</i>    | Bilsa Biological Station, Bilsa, Esmeraldas, West Ecuador     | N 0.36076, W 79.71486 |
| 04N8453 | <i>Xenops minutus</i>    | Bilsa Biological Station, Bilsa, Esmeraldas, West Ecuador     | N 0.36076, W 79.71486 |
| 04N8463 | <i>Xenops minutus</i>    | Bilsa Biological Station, Bilsa, Esmeraldas, West Ecuador     | N 0.36076, W 79.71486 |
| 04N8539 | <i>Xenops minutus</i>    | Bilsa Biological Station, Bilsa, Esmeraldas, West Ecuador     | N 0.36076, W 79.71486 |
| 05N7414 | <i>Xenops minutus</i>    | Bilsa Biological Station, Bilsa, Esmeraldas, West Ecuador     | N 0.36076, W 79.71486 |
| 05N7418 | <i>Xenops minutus</i>    | Bilsa Biological Station, Bilsa, Esmeraldas, West Ecuador     | N 0.36076, W 79.71486 |
| 05N8871 | <i>Xenops minutus</i>    | Bilsa Biological Station, Bilsa, Esmeraldas, West Ecuador     | N 0.36076, W 79.71486 |
| 05N9023 | <i>Xenops minutus</i>    | Bilsa Biological Station, Bilsa, Esmeraldas, West Ecuador     | N 0.36076, W 79.71486 |
| 05N9160 | <i>Xenops minutus</i>    | Bilsa Biological Station, Bilsa, Esmeraldas, West Ecuador     | N 0.36076, W 79.71486 |
| 05N9645 | <i>Xenops minutus</i>    | Bilsa Biological Station, Bilsa, Esmeraldas, West Ecuador     | N 0.36076, W 79.71486 |
| 05N9995 | <i>Xenops minutus</i>    | Bilsa Biological Station, Bilsa, Esmeraldas, West Ecuador     | N 0.36076, W 79.71486 |
| 00N0890 | <i>Xenops minutus</i>    | Estacion Cientifica Yasuni, Yasuni, Orellana, East Ecuador    | S 0.67455, W 76.39837 |
| 00N0554 | <i>Xenops minutus</i>    | Guagua Sumaco, Guagua Sumaco, Napo, East Ecuador              | S 0.72493, W 77.57564 |
| 07-0042 | <i>Xenops minutus</i>    | Inselberg Station, Nouragues, French Guiana                   | N 4.09412, W 52.68438 |
| 08-0881 | <i>Xenops minutus</i>    | Paracou Field Station, Paracou, French Guiana                 | N 5.27595, W 52.9280  |
| 00N0676 | <i>Xenops minutus</i>    | Tiputini Biological Station, Tiputini, Orellana, East Ecuador | S 0.63698, W 76.14912 |
| 00N0747 | <i>Xenops minutus</i>    | Tiputini Biological Station, Tiputini, Orellana, East Ecuador | S 0.63698, W 76.14912 |
| 00N1053 | <i>Xenops minutus</i>    | Tiputini Biological Station, Tiputini, Orellana, East Ecuador | S 0.63698, W 76.14912 |
| 00N5019 | <i>Xenops minutus</i>    | Tiputini Biological Station, Tiputini, Orellana, East Ecuador | S 0.63698, W 76.14912 |
| 00N5069 | <i>Xenops minutus</i>    | Tiputini Biological Station, Tiputini, Orellana, East Ecuador | S 0.63698, W 76.14912 |
| 05N0057 | <i>Xenops minutus</i>    | Tiputini Biological Station, Tiputini, Orellana, East Ecuador | S 0.63698, W 76.14912 |
| 05N0066 | <i>Xenops minutus</i>    | Tiputini Biological Station, Tiputini, Orellana, East Ecuador | S 0.63698, W 76.14912 |
| 05N0077 | <i>Xenops minutus</i>    | Tiputini Biological Station, Tiputini, Orellana, East Ecuador | S 0.63698, W 76.14912 |
