# Supplementary material for: A Trans-Amazonian Screening of mtDNA Reveals Deep Intraspecific Divergence in Forest Birds and Suggests a Vast Underestimation of Species Diversity
Source: PLoS One. 2012 Jul 17;7(7):e40541. doi: 10.1371/journal.pone.0040541 (PMC3398903; doi:10.1371/journal.pone.0040541)
Supplement: Table S2 — Descriptions of phenotypic characteristics of eastern and western Amazonian populations of target species. (PDF) [file pone.0040541.s002.pdf]

**Table S2.** Phenotypic characteristics of eastern and western Amazonian populations of target species. Descriptions based on Restall et al. (2006). EC = Ecuador, FG = French Guiana.

| Species                          | Subspecies EC                                   | Subspecies FG             | Phenotype EC                                                                                                                     | Phenotype FG                                                                                                                        | Phenotypic score |
|----------------------------------|-------------------------------------------------|---------------------------|----------------------------------------------------------------------------------------------------------------------------------|-------------------------------------------------------------------------------------------------------------------------------------|------------------|
| <i>Geotrygon montana</i>         | <i>G. m. montana</i>                            | <i>G. m. montana</i>      | No differences reported.                                                                                                         | No differences reported.                                                                                                            | 1                |
| <i>Phaetornis bourcierii</i>     | <i>P. b. bourcierii</i>                         | <i>P. b. whitelyi</i>     | Whitish throat, pale buffy flanks, more greenish crown, golden-buffy edges to uppertail-coverts.                                 | Buffy throat and flanks; paler edges to uppertail-coverts                                                                           | 2                |
| <i>Campylopterus largipennis</i> | <i>C. l. aequatorialis</i>                      | <i>C. l. largipennis</i>  | White restricted to tip of rectrices.                                                                                            | White distal half of tail.                                                                                                          | 3                |
| <i>Thalurania furcata</i>        | <i>T. f. viridipectus</i>                       | <i>T. f. furcata</i>      | Male: nape green; green gorget extends to breast; undertail-coverts fringed white.                                               | Male: nape blue; gorget restricted to throat; undertail-coverts fringed pale blue.                                                  | 4                |
| <i>Trogon rufus</i>              | <i>T. r. sulphureus</i>                         | <i>T. r. rufus</i>        | Eye ring yellow in both sexes; male breast green; male tail reddish-coppery with green subterminal and black terminal bands.     | Eye ring blue in both sexes; male breast cobalt-blue; male tail pale-olivaceous green with black terminal band.                     | 4                |
| <i>Chloroceryle aenea</i>        |                                                 |                           | No differences reported.                                                                                                         | No differences reported.                                                                                                            | 1                |
| <i>Momotus momota</i>            | <i>M. m. microstephanus</i>                     | <i>M. m. momota</i>       | Nape violet-blue.                                                                                                                | Nape rufous.                                                                                                                        | 4                |
| <i>Galbula albirostris</i>       | <i>G. a. chacocephala</i>                       | <i>G. a. albirostris</i>  | Male: crown reddish-purple, chin partially dusky, underparts deep rufous.                                                        | Male: crown deep maroon, chin buff, underparts cinnamon.                                                                            | 3                |
| <i>Philydor erythrocerum</i>     | <i>P. e. subfulvum</i>                          | <i>P. e. erythrocerum</i> | Generally paler, with eyebrow and throat pale buffy, underparts washed more greyish-olive.                                       | Generally more rufescent, more rufous on rump, eyebrow more orange.                                                                 | 2                |
| <i>Automolus ochrolaemus</i>     | <i>A. o. turdinus</i>                           | <i>A. o. turdinus</i>     | No differences reported.                                                                                                         | No differences reported.                                                                                                            | 1                |
| <i>Xenops minutus</i>            | <i>X. m. obsoletus</i>                          | <i>X. m. ruficaudus</i>   | Whitish throat more extensive, and feathers have fine brownish fringes; some chest streaking.                                    | Darker crown; narrow buff streaks and broader brown fringes to throat feathers; obvious chest streaking.                            | 2                |
| <i>Sclerurus mexicanus</i>       | <i>S. m. peruvianus</i>                         | <i>S. m. macconelli</i>   | Rump and upper tail coverts almost concolorous with back; orange only on throat.                                                 | Rump and uppertail-coverts bright rufous; orange-rufous of throat extends to breast and belly.                                      | 3                |
| <i>Dendrocincla fuliginosa</i>   | <i>D. f. neglecta</i> / <i>D. f. phaeochroa</i> | <i>D. f. fuliginosa</i>   | Slightly darker and more olivaceous above; whiter throat; no streaks on throat; no postocular markings; legs and feet blue-grey. | Chin and throat buffy, flecked dusky and white, with pale shaft streaks; postocular row of tawny-orange spots; legs and feet black. | 4                |
| <i>Glyphorynchus spirurus</i>    | <i>G. s. castelnaudii</i>                       | <i>G. s. spirurus</i>     | Variable, throat cinnamon, generally darker, more olivaceous below; shorter, stouter bill.                                       | Chin and throat pale orange, scaled dark olive, pale buffy spots on breast large and diamond-shaped, fine streaks on belly.         | 3                |
| <i>Thamnomanes ardesiacus</i>    | <i>T. a. ardesiacus</i>                         | <i>T. a. obidensis</i>    | Male: black restricted to chin.                                                                                                  | Male: full black chin and throat.                                                                                                   | 3                |
| <i>Thamnomanes caesioides</i>    | <i>T. c. glaucus</i>                            | <i>T. c. glaucus</i>      | No differences reported.                                                                                                         | No differences reported.                                                                                                            | 1                |

|                                                    |                             |                             |                                                                                                                                                                                                                                              |                                                                                                                                                                     |   |
|----------------------------------------------------|-----------------------------|-----------------------------|----------------------------------------------------------------------------------------------------------------------------------------------------------------------------------------------------------------------------------------------|---------------------------------------------------------------------------------------------------------------------------------------------------------------------|---|
| <i>Myrmotherula axillaris</i>                      | <i>M. a. melanea</i>        | <i>M. a. axillaris</i>      | Male: much blacker above, charcoal rather than slate, and black more extensive on vent, wings and tail darker and undertail-coverts with a little black on centres; less white on flanks. Female: olive above, darker on sides, paler below. | Male: slate grey above with white outer fringes to scapulars; undertail-coverts subterminally black with white fringes. Female: rufescent olive above.              | 3 |
| <i>Myrmotherula longipennis</i>                    | <i>M. l. zimмери</i>        | <i>M. l. longipennis</i>    | Female: head darker greyish-olive, back bluish-grey, wings and tail darker with more contrasting cinnamon spots on wings; cinnamon below.                                                                                                    | Female: olive-brown above with slight greyish tone, rufous-buffy fringes to wing-coverts and tips of tail; whitish belly.                                           | 4 |
| <i>Myrmotherula menetriesii</i>                    | <i>M. m. pallida</i>        | <i>M. m. cinereiventris</i> | Male: uniform grey. Female: grey above, tinged olive, underparts rich cinnamon.                                                                                                                                                              | Male: slightly darker, with occasional black dot on breast. Female: brownish-olive above, distinctly paler ochraceous below with slight grey wash on flanks.        | 4 |
| <i>Hypocnemis cantator</i>                         | <i>H. c. saturata</i>       | <i>H. c. cantator</i>       | Yellow throat to breast, with a few deliberate black streaks on sides; brighter rufous below.                                                                                                                                                | White chin to belly, with some streaking; flanks to undertail-coverts rich rufous.                                                                                  | 4 |
| <i>Hylophylax naevius</i>                          | <i>H. n. theresae</i>       | <i>H. n. naevius</i>        | More extensive black and more extensively streaked pale on back; more extensively streaked black below; larger white tips to tail.                                                                                                           |                                                                                                                                                                     | 2 |
| <i>Hylophylax poecilinotus</i>                     | <i>H. p. lepidonotus</i>    | <i>H. p. poecilinotus</i>   | Female: entire underparts pale rufous, yellowish-ochre belly.                                                                                                                                                                                | Female: top and sides of head deep rufous; chin tinged pale rufous; throat white; breast to undertail-coverts grey, tinged pale rufescent on flanks; thighs rufous. | 4 |
| <i>Pithys albifrons</i>                            | <i>P. a. peruvianus</i>     | <i>P. a. albifrons</i>      |                                                                                                                                                                                                                                              | Narrow white postocular line. [Note: Grey nape, as described in Restall et al. 2006, is an error]                                                                   | 4 |
| <i>Formicarius colma</i>                           | <i>F. c. nigrifrons</i>     | <i>F. c. colma</i>          | Black usually to forecrown; legs and feet vinaceous                                                                                                                                                                                          | Black restricted to forehead; legs and feet dark vinaceous                                                                                                          | 2 |
| <i>Formicarius analis</i>                          | <i>F. a. zamorae</i>        | <i>F. a. crissalis</i>      | Very dark with intense colours, very small white loreal spot.                                                                                                                                                                                | Palest race, bright pale chestnut patch behind ear-coverts and large white loreal spot.                                                                             | 4 |
| <i>Conopophaga aurita</i>                          | <i>C. a. occidentalis</i>   | <i>C. a. aurita</i>         | Male: darker above with heavy black scallops, rufous more extensive on breast. Female: white chin.                                                                                                                                           | Fine black scallops on back and belly mainly clear white. Female: white chin and throat.                                                                            | 3 |
| <i>Mionectes oleagineus</i> / <i>M. macconelli</i> | <i>M. o. hauxwelli</i>      | <i>M. m. macconelli</i>     | Olive above with two diffuse ochraceous wingbars.                                                                                                                                                                                            | Dark olive-green above, with no wingbars.                                                                                                                           | 4 |
| <i>Corythopis torquatus</i>                        | <i>C. t. sarayacuensis</i>  | <i>C. t. anthoides</i>      | Crown concolorous with brownish-olive back.                                                                                                                                                                                                  | Slightly smaller; crown slate grey.                                                                                                                                 | 2 |
| <i>Rhynchocyclus olivaceus</i>                     | <i>R. o. aequinoctialis</i> | <i>R. o. guianensis</i>     | Yellow fringes to wing-coverts.                                                                                                                                                                                                              | Yellow-ochre fringes to wing-coverts.                                                                                                                               | 2 |
| <i>Platyrinchus coronatus</i>                      | <i>P. c. coronatus</i>      | <i>P. c. gumia</i>          |                                                                                                                                                                                                                                              | Smaller, with brighter yellow belly.                                                                                                                                | 2 |
| <i>Myiobius barbatus</i>                           | <i>M. b. barbatus</i>       | <i>M. b. barbatus</i>       | No differences reported.                                                                                                                                                                                                                     | No differences reported.                                                                                                                                            | 1 |

|                                |                                                                            |                             |                                                                                                                                                                                                                                                |                                                                                                                                                                                                                                                                    |   |
|--------------------------------|----------------------------------------------------------------------------|-----------------------------|------------------------------------------------------------------------------------------------------------------------------------------------------------------------------------------------------------------------------------------------|--------------------------------------------------------------------------------------------------------------------------------------------------------------------------------------------------------------------------------------------------------------------|---|
| <i>Pipra erythrocephala</i>    | <i>P. e. berlepschi</i>                                                    | <i>P. e. erythrocephala</i> | Uniform yellow head with narrow, sharply defined red border.                                                                                                                                                                                   | Orange head with variable reddish suffusion.                                                                                                                                                                                                                       | 3 |
| <i>Dixiphia pipra</i>          | <i>D. p. coracina</i>                                                      | <i>D. p. pipra</i>          | Male: grey bases to white feathers. Female: clean grey top of head and nape, whitish-yellow head-sides, bright yellowish bellow.                                                                                                               | Male: pure white cap. Female: olive-green above with greyish tone to head, grey underparts washed olive-green, slightly paler on belly and vent.                                                                                                                   | 4 |
| <i>Schiffornis turdina</i>     | <i>S. t. aenea</i> (E slope of Andes) / <i>S. t. amazona</i> (NE lowlands) | <i>S. t. wallacii</i>       | <i>S. t. aenea</i> has browner crown than <i>S. t. amazona</i> .                                                                                                                                                                               | Like <i>amazona</i>                                                                                                                                                                                                                                                | 2 |
| <i>Hylophilus ochraceiceps</i> | <i>H. o. ferrugineifrons</i>                                               | <i>H. o. luteifrons</i>     | Tawny forecrown; grey underparts washed narrowly olive on sides and flanks; eyes yellowish white.                                                                                                                                              | Yellowish-rufous forecrown; throat greyish or yellowish-white, buffier below, specially on breast; eyes brown.                                                                                                                                                     | 4 |
| <i>Cyphorhinus arada</i>       | <i>C. a. salvini</i>                                                       | <i>C. a. arada</i>          | Lacks bold streaks on mantle; bright chestnut eyebrow starts at lores and supraloral, bright chestnut from chin to breast and sides; rest of underparts deep chestnut-brown but not as dark as upperparts; lacks barring on undertail coverts. | Nape and mantle streaked with long white "teardrops", postocular white eyebrow washed chestnut, lower breast and upper belly pale buffy, breast-sides, flanks and lower belly to undertail-coverts brown with black streaks on sides; barring on undertail coverts | 4 |
| <i>Microcerculus bambla</i>    | <i>M. b. albigularis</i>                                                   | <i>M. b. bambla</i>         | Similar to <i>bambla</i> , but evenly and finely barred from forehead to uppertail-coverts; very pale grey chin and throat; grey breast and sides                                                                                              | Slightly greyish-brown above with regular and even black bars on rump to uppertail-coverts, throat broadly mauve-grey.                                                                                                                                             | 4 |
| <i>Turdus albicollis</i>       | <i>T. a. spodiolaemus</i>                                                  | <i>T. a. phaeopygus</i>     | More rufous -olive above and heavier throat streaking; lower mandible yellow; legs and feet dark horn.                                                                                                                                         | Bill black, legs and feet grey.                                                                                                                                                                                                                                    | 4 |
| <i>Lanio fulvus</i>            | <i>L. f. peruvianus</i>                                                    | <i>L. f. fulvus</i>         |                                                                                                                                                                                                                                                | Generally more fulvescent, with only nape bright yellow.                                                                                                                                                                                                           | 2 |
| <i>Tachyphonus surinamus</i>   | <i>T. s. brevipes</i>                                                      | <i>T. s. surinamis</i>      | Male: buffy-white pectoral tuft. Female: paler below, creamy buff to pale cinnamon on undertail-coverts.                                                                                                                                       | Male: crest longer with a few black tips to central feathers, pectoral tufts white. Female: pale cinnamon below with cinnamon undertail coverts; eye-ring more prominent.                                                                                          | 2 |
| <i>Cyanocompsa cyanoides</i>   | <i>C. c. rothschildii</i>                                                  | <i>C. c. rothschildii</i>   | No differences reported.                                                                                                                                                                                                                       | No differences reported.                                                                                                                                                                                                                                           | 1 |
